# Supplementary material for: Cys-Ph-TAHA: a lanthanide binding tag for RDC and PCS enhanced protein NMR
Source: PubMed Central journal article supplement — J Biomol NMR. 2011 Sep 4;51(3):329–37. doi: 10.1007/s10858-011-9560-y (PMC3193991; doi:10.1007/s10858-011-9560-y), 2011-09-04
Supplement: 10858_2011_9560_MOESM1_ESM.pdf [file 10858_2011_9560_MOESM1_ESM.pdf]

## Supporting Information

### Synthesis of Cys-Ph-TAHA

#### *Materials and Methods*

All used chemicals and solvents are commercially available. Reactions were controlled by thin layer chromatography (TLC) using Macherey-Nagel precoated sheets, 0.25 mm Polygram SIL G/UV<sub>254</sub> plates. Spots were visualized by 10 wt% ethanolic phosphomolybdic acid reagent and were heated at 200 °C. Flash column chromatography was performed by using Merck silica gel 60 (0.015–0.040 mm). Analytical and preparative HPLC separations were carried out using a Jasco HPLC system with a DAD detector. HPLC was performed using a reversed phase (RP) column (Eurospher RP 18) from Knauer: 150 x 4.6 mm (analytical) and 250 x 8 mm (preparative) at flow rates of 1 mL·min<sup>-1</sup> (analytical) and 3 mL·min<sup>-1</sup> (preparative). The mobile phase contained of 0.1% TFA in water (solvent A) and 0.1% TFA in acetonitril (solvent B). ESI-MS spectra were measured using a Waters Micromass ZQ 4000 mass spectrometer. NMR spectra were recorded at 298 K using a 400 MHz Bruker Avance spectrometer equipped with a TXI HCN z-gradient probe head. Spectra were processed and analyzed with Topspin 2.0 (Bruker Biospin).

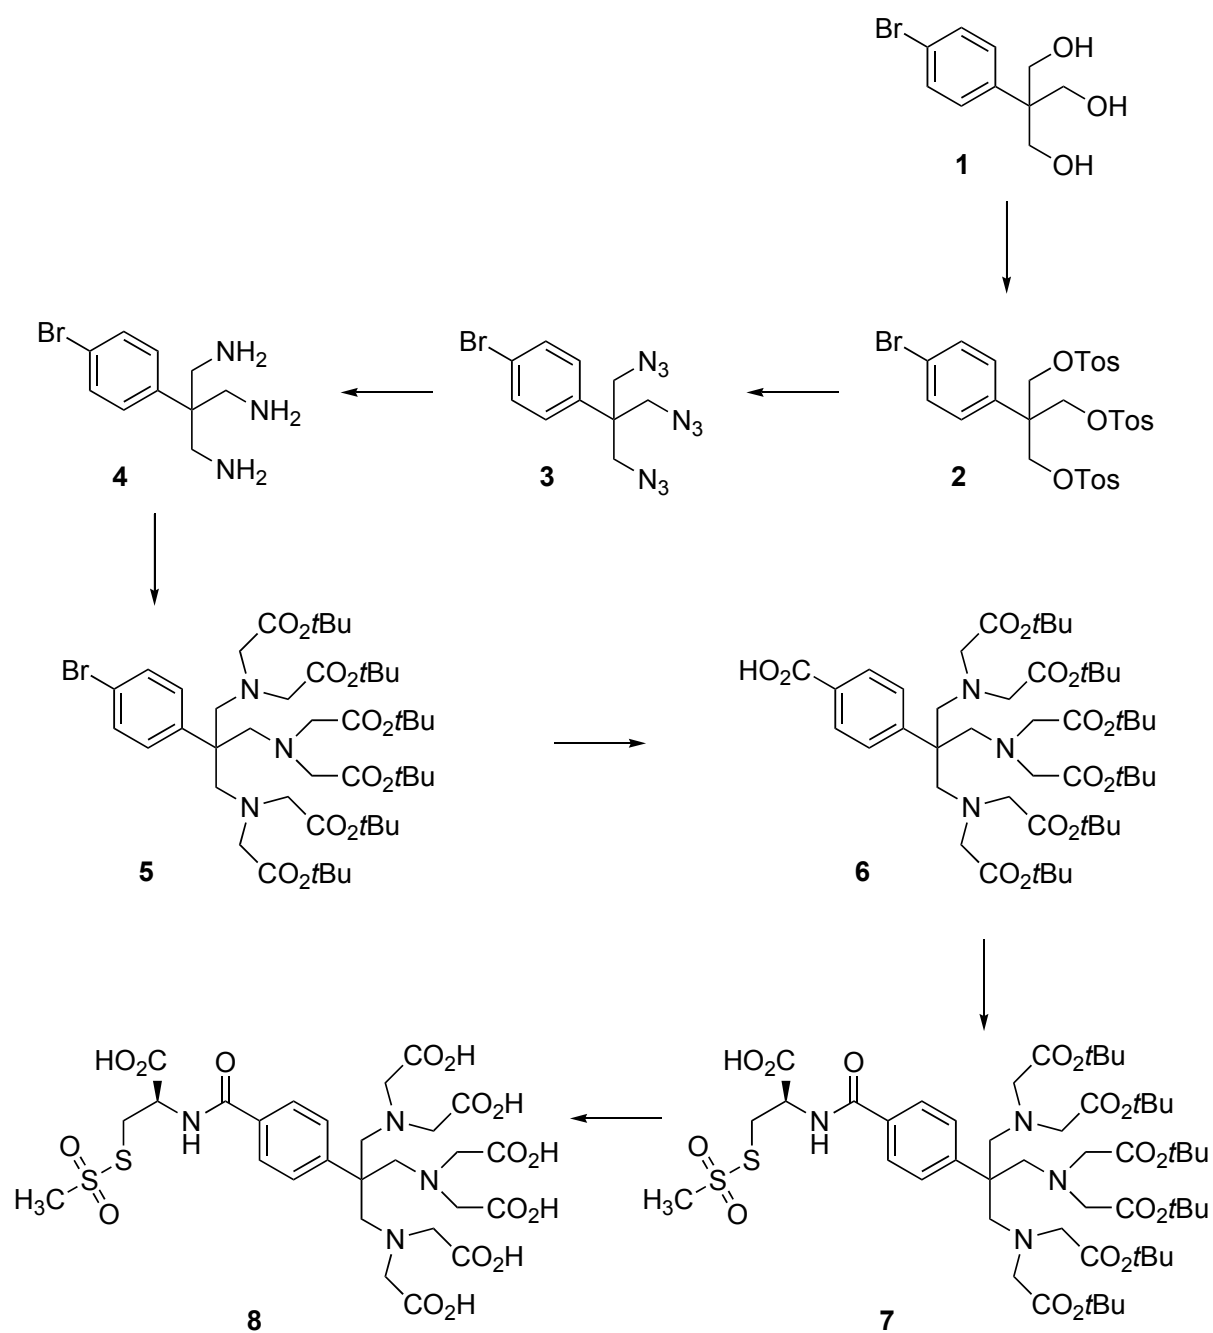

**Scheme S1.** Synthesis of Cys-Ph-TAHA.

#### 4-Bromo- $\alpha$ - $\alpha$ - $\alpha$ -tris(tosyloxymethyl)toluene (2)

Compound **1** (4.70 g, 18.00 mmol) was dissolved in abs. pyridine (120 mL). Tosyl chloride (20.60 g, 108.05 mmol, 10.0 eq.) was added and the solution stirred at RT for 60 h. Pyridinium chloride was removed by filtration and the filtrate evaporated in vacuo. To the residue H<sub>2</sub>O (250 mL) and CH<sub>2</sub>Cl<sub>2</sub> (250 mL) were added and the phases separated. The aqueous layer was extracted with CH<sub>2</sub>Cl<sub>2</sub> (3 x 200 mL) and the combined organic layers were dried over Na<sub>2</sub>SO<sub>4</sub> and concentrated in vacuo. Purification by column chromatography (CH<sub>2</sub>Cl<sub>2</sub>) yielded **2** (11.85 g, 16.37 mmol, 91%) as a white foam. **<sup>1</sup>H-NMR** (CDCl<sub>3</sub>, 400 MHz):  $\delta$  = 7.59 (d,  $J$  = 8.2 Hz, 6H, 6 x Tos-Ar), 7.30 (d,  $J$  = 8.2 Hz, 6H, 6 x Tos-Ar), 7.22 (d,  $J$  = 8.6 Hz, 2H, H-3, H-5), 6.76 (d,  $J$  = 8.6 Hz, 2H, H-2, H-6), 4.14 (s, 6H, 3 x CH<sub>2</sub>), 2.46 (s, 9H, 3 x CH<sub>3</sub>) ppm. **<sup>13</sup>C-NMR** (CDCl<sub>3</sub>, 100.6 MHz):  $\delta$  = 145.4 (3C, 3 x Tos-Ar), 133.8 (1C, C-1), 131.8 (2C, C-3, C-5), 131.5 (3C, 3 x Tos-Ar), 130.0 (6C, 6 x Tos-Ar), 127.8 (8C, C-2, C-6, 6 x Tos-Ar), 122.2 (1C, C-4), 68.4 (3C, 3 x CH<sub>2</sub>), 45.9 (1C, C- $\alpha$ ), 21.6 (3C, 3 x CH<sub>3</sub>) ppm. **ESI-MS**  $m/z$  (methanol, positive mode): calcd. for C<sub>31</sub>H<sub>31</sub><sup>79</sup>BrNaO<sub>9</sub>S<sub>3</sub> [M+Na]<sup>+</sup>: 745.02, found: 744.94.

#### 4-Bromo- $\alpha$ - $\alpha$ - $\alpha$ -tris(azidomethyl)toluene (3)

Compound **2** (11.50 g, 15.89 mmol) was dissolved in 500 mL abs. DMF. NaN<sub>3</sub> (6.19 g, 95.23 mmol, 6.0 eq.) was added and the suspension stirred at 100 °C for 18 h. After cooling, 1.4 L of H<sub>2</sub>O were added and the aqueous layer was extracted with CH<sub>2</sub>Cl<sub>2</sub> (3 x 500 mL). The combined organic layers were washed with H<sub>2</sub>O (500 mL), dried over Na<sub>2</sub>SO<sub>4</sub> and concentrated in vacuo to a solvent residue of 30 mL. THF (50 mL) was added and again the volume was reduced in vacuo to 30 mL. This procedure was repeated twice. The resulting THF solution was filled up to 400 mL under argon atmosphere and directly used for the following reaction.

#### 4-Bromo- $\alpha$ - $\alpha$ - $\alpha$ -tris(aminomethyl)toluene (4)

To the THF solution of the azide **3** triphenylphosphine (37.53 g, 143.10 mmol, 9.0 eq.) was added and stirred for 2 h at 65 °C. After gas formation has stopped, **4** was set free by adding 2M NaOH solution (200 mL) and stirring for another 2 h at 65 °C. Afterwards the reaction mixture was acidified to pH 1 and the aqueous phase was washed with CHCl<sub>3</sub> (3 x 300 mL). Subsequently, solid NaOH was added to set pH 12 and extracted with CHCl<sub>3</sub> (5 x 300 mL). The combined organic layers dried

over Na<sub>2</sub>SO<sub>4</sub> and concentrated in vacuo to yield the product **4** (3.80 g, 14.72 mmol, 93% over 2 steps) as yellow oil. **<sup>1</sup>H-NMR** (MeOH-d<sub>4</sub>, 400 MHz): δ = 7.55 (d, *J* = 8.6 Hz, 2H, H-3, H-5), 7.30 (d, *J* = 8.6 Hz, 2H, H-2, H-6), 2.90 (s, 6H, 3 x CH<sub>2</sub>) ppm. **<sup>13</sup>C-NMR** (MeOH-d<sub>4</sub>, 100.6 MHz): δ = 141.4 (1C, C-1), 131.4 (2C, C-3, C-5), 128.6 (2C, C-2, C-6), 120.6 (1C, C-4), 48.3 (1C, C-α), 45.0 (3C, CH<sub>2</sub>) ppm. **ESI-MS** *m/z* (methanol, positive mode): calcd. for C<sub>10</sub>H<sub>17</sub><sup>79</sup>BrN<sub>3</sub> [M+H]<sup>+</sup>: 258.06, found: 257.98.

#### **4-Bromo-α-α-α-tris[[*N,N*-di(*tert*-butoxycarbonylmethyl)amino]methyl]toluene**

##### **(5)**

Compound **4** (3.30 g, 12.78 mmol) was dissolved under argon atmosphere in abs. MeCN (330 mL). DIPEA (26.75 mL, 156.27 mmol, 12.2 eq.) and *tert*-butyl bromoacetate (17.0 mL, 115.05 mmol, 9.0 eq.) were added and the resulting solution refluxed for 42 h. The solvent was removed in vacuo and the residue dissolved in CH<sub>2</sub>Cl<sub>2</sub>. The solution was washed with 5% citric acid solution (2 x 200 mL) and H<sub>2</sub>O (200 mL), dried over Na<sub>2</sub>SO<sub>4</sub> and concentrated in vacuo. Purification by column chromatography (CH<sub>2</sub>Cl<sub>2</sub>/MeOH 100:1) yielded **5** (11.69 g, 12.40 mmol, 97%) as a yellow foam. **<sup>1</sup>H-NMR** (CDCl<sub>3</sub>, 400 MHz): δ = 7.31 (d, *J* = 8.7 Hz, 2H, H-3, H-5), 7.25 (d, *J* = 8.7 Hz, 2H, H-2, H-6), 3.17 (s, 18H, 9 x CH<sub>2</sub>), 1.39 (s, 54H, 6 x C(CH<sub>3</sub>)<sub>3</sub>) ppm. **<sup>13</sup>C-NMR** (CDCl<sub>3</sub>, 100.6 MHz): δ = 170.9 (6C, 6 x CO<sub>2</sub>*t*-Bu), 143.7 (1C, C-1), 131.3 (2C, C-3, C-5), 128.6 (2C, C-2, C-6), 119.8 (1C, C-4), 80.4 (6C, 6 x C(CH<sub>3</sub>)<sub>3</sub>), 59.3 (3C, 3 x C-αCH<sub>2</sub>), 56.5 (6C, 6 x NCH<sub>2</sub>CO<sub>2</sub>*t*-Bu), 48.5 (1C, C-α), 28.0 (18C, 18 x C(CH<sub>3</sub>)<sub>3</sub>) ppm. **ESI-MS** *m/z* (methanol, positive mode): calcd. for C<sub>46</sub>H<sub>77</sub><sup>79</sup>BrN<sub>3</sub>O<sub>12</sub> [M+H]<sup>+</sup>: 944.47, found: 944.44.

#### **α-α-α-Tris[[*N,N*-di(*tert*-butoxycarbonylmethyl)amino]methyl]-*p*-toluic acid (6)**

Compound **5** (360 mg, 0.382 mmol) was dissolved in abs. DMF (6.5 mL). Dried lithium formate (179 mg, 3.44 mmol, 9.0 eq.) and PdCl<sub>2</sub>(dppf) (28 mg, 36.2 μmol, 10 mol%) were added. Argon gas was directed through the suspension for 20 min. Afterwards, acetic anhydride (216 μL, 2.29 mmol, 6.0 eq.) and DIPEA (392 μL, 2.29 mmol, 6.0 eq.) were added and the suspension stirred for 44 h at 120 °C. After cooling, ethyl acetate (80 mL) was added and the organic phase washed with H<sub>2</sub>O (2 x 50 mL), dried over Na<sub>2</sub>SO<sub>4</sub> and concentrated in vacuo. Purification by column chromatography (CH<sub>2</sub>Cl<sub>2</sub>/MeOH 20:1) yielded **6** (282 mg, 0.311 mmol, 81%) as a brown oil. **<sup>1</sup>H-NMR** (CDCl<sub>3</sub>, 400 MHz): δ = 7.99 (d, *J* = 8.2 Hz, 2H, H-3, H-5), 7.55 (d,

$J = 8.2$  Hz, 2H, H-2, H-6), 3.31 (s, 6H, 3 x C- $\alpha$ CH<sub>2</sub>), 3.22 (s, 12H, 6 x CH<sub>2</sub>CO<sub>2</sub>*t*-Bu), 1.42 (s, 54H, 6 x C(CH<sub>3</sub>)<sub>3</sub>) ppm. **<sup>13</sup>C-NMR** (CDCl<sub>3</sub>, 100.6 MHz):  $\delta = 170.0$  (7C, 6 x CO<sub>2</sub>*t*-Bu, C-4CO<sub>2</sub>H), 151.3 (1C, C-1), 130.2 (2C, C-3, C-5), 126.9 (2C, C-2, C-6), 127.3 (1C, C-4), 80.6 (6C, 6 x C(CH<sub>3</sub>)<sub>3</sub>), 59.5 (3C, 3 x C- $\alpha$ CH<sub>2</sub>), 56.6 (6C, 6 x NCH<sub>2</sub>CO<sub>2</sub>*t*-Bu), 49.4 (1C, C- $\alpha$ ), 28.1 (18C, 18 x C(CH<sub>3</sub>)<sub>3</sub>) ppm. **ESI-MS**  $m/z$  (methanol, positive mode): calcd. for C<sub>47</sub>H<sub>78</sub>N<sub>3</sub>O<sub>14</sub> [M+H]<sup>+</sup>: 908.55, found: 908.57.

***N*-[4-[ $\alpha$ - $\alpha$ - $\alpha$ -Tris[[*N,N*-di(*tert*-butoxycarbonylmethyl)amino]methyl]methyl]benzoyl]-*S*-mesyl-(*R*)-cysteine (7)**

Compound **6** (178 mg, 196  $\mu$ mol) was dissolved in 10 mL abs. DMF. HATU (75 mg, 196  $\mu$ mol, 1.0 eq.) and DIPEA (33.5  $\mu$ L, 196  $\mu$ mol, 1.0 eq.) were added and the solution stirred for 2.5 h at RT. Subsequently, *S*-mesyl-(*R*)-cysteine (39 mg, 196  $\mu$ mol, 1.0 eq.) and again DIPEA (33.5  $\mu$ L, 196  $\mu$ mol, 1.0 eq.) were added and the reaction mixture was stirred for another 20 h. Afterwards the solvent was removed in vacuo, to the residue H<sub>2</sub>O and CHCl<sub>3</sub> (30 mL each) were added and the phases separated. The aqueous layer was extracted with CHCl<sub>3</sub> (2 x 20 mL) and the combined organic phase was dried over Na<sub>2</sub>SO<sub>4</sub> and concentrated in vacuo. Purification by column chromatography (CH<sub>2</sub>Cl<sub>2</sub>/MeOH from 25:1 to 8:1) yielded **7** (147 mg, 135  $\mu$ mol, 69%) in form of a brown oil. Additionally, educt **6** (31 mg, 34  $\mu$ mol, 17%) was re-isolated. **<sup>1</sup>H-NMR** (CDCl<sub>3</sub>, 400 MHz):  $\delta = 8.02$  (s, 1H, NH), 7.82 (s, 2H, H-3, H-5), 7.52 (s, 2H, H-2, H-6), 4.71–4.89 (m, 1H, SCH<sub>2</sub>CH), 3.60–4.00 (m, 2H, SCH<sub>2</sub>), 3.36 (s, 3H, SCH<sub>3</sub>), 3.28 (s, 6H, 3 x C- $\alpha$ CH<sub>2</sub>), 3.22 (s, 12H, 6 x NCH<sub>2</sub>CO<sub>2</sub>*t*-Bu), 1.43 (s, 54H, 6 x C(CH<sub>3</sub>)<sub>3</sub>) ppm. **<sup>13</sup>C-NMR** (CDCl<sub>3</sub>, 100.6 MHz):  $\delta = 171.0$  (6C, 6 x CO<sub>2</sub>*t*-Bu), 167.6 (1C, CO<sub>2</sub>H), 162.9 (1C, NHCO), 149.3 (1C, C-1), 130.6 (1C, C-4), 127.6 (2C, C-3, C-5), 126.9 (2C, C-2, C-6), 80.7 (6C, 6 x C(CH<sub>3</sub>)<sub>3</sub>), 59.6 (3C, 3 x C- $\alpha$ CH<sub>2</sub>), 56.6 (6C, 6 x NCH<sub>2</sub>CO<sub>2</sub>*t*-Bu), 54.6 (1C, SCH<sub>2</sub>CH), 50.3 (1C, C- $\alpha$ ), 34.7 (1C, SCH<sub>2</sub>CH), 28.2 (18C, 18 x C(CH<sub>3</sub>)<sub>3</sub>) ppm. **ESI-MS**  $m/z$  (methanol, positive mode): calcd. for C<sub>51</sub>H<sub>85</sub>N<sub>4</sub>O<sub>17</sub>S<sub>2</sub> [M+H]<sup>+</sup>: 1089.54, found: 1089.49.

***N*-[4-[ $\alpha$ - $\alpha$ - $\alpha$ -Tris[[*N,N*-di(carboxymethyl)amino]methyl]methyl]benzoyl]-*S*-mesyl-(*R*)-cysteine (8)**

Compound **7** (209 mg, 192  $\mu$ mol) was dissolved in 20 mL concentrated TFA and stirred at RT overnight. Afterwards the reaction mixture was concentrated in vacuo.

The residue was dissolved in H<sub>2</sub>O (16 mL) and centrifuged to remove insoluble particles. The solution was purified by preparative HPLC (0–30% A in 30 min). Combined product fractions yielded after lyophilisation **Cys-Ph-TAHA, 8** (89 mg, 118 μmol, 61%) as a white powder. **<sup>1</sup>H-NMR** (D<sub>2</sub>O, 400 MHz): δ = 7.81 (d, *J* = 7.9 Hz, 2H, H-3, H-5), 7.66 (d, *J* = 7.9 Hz, 2H, H-2, H-6), 4.86–4.95 (m, 1H, SCH<sub>2</sub>CH), 3.83 (d, *J* = 13.8 Hz, 1H, SCH<sub>a</sub>H<sub>b</sub>), 3.69–3.61 (m, 7H, SCH<sub>a</sub>H<sub>b</sub>}, 3 x C-αCH<sub>2</sub>), 3.56 (s, 12H, 6 x NCH<sub>2</sub>CO<sub>2</sub>H), 3.42 (s, 3H, CH<sub>3</sub>) ppm. **<sup>13</sup>C-NMR** (D<sub>2</sub>O, 100.6 MHz): δ = 172.5 (7C, 7 x CO<sub>2</sub>H), 169.3 (1C, C-4CO), 143.3 (1C, C-1), 131.9 (1C, C-4), 127.9 (2C, C-3, C-5), 126.8 (2C, C-2, C-6), 60.7 (3C, 3 x C-αCH<sub>2</sub>), 55.7 (6C, 6 x NCH<sub>2</sub>CO<sub>2</sub>H), 52.6 (1C, SCH<sub>2</sub>CH), 49.4 (1C, CH<sub>3</sub>), 46.1 (1C, C-α), 36.2 (1C, SCH<sub>2</sub>CH) ppm. **ESI-MS** *m/z* (water, positive mode): calcd. for C<sub>27</sub>H<sub>37</sub>N<sub>4</sub>O<sub>17</sub>S<sub>2</sub> [M+H]<sup>+</sup>: 753.16, found: 753.08. **ESI-HRMS** *m/z* (water, positive mode): calcd. for C<sub>27</sub>H<sub>37</sub>N<sub>4</sub>O<sub>17</sub>S<sub>2</sub> [M+H]<sup>+</sup>: 753.1590, found: 753.1588.

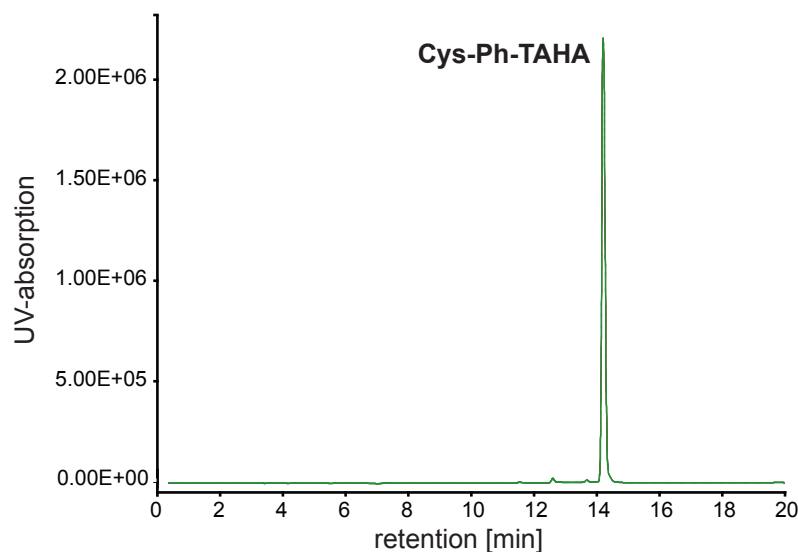

HPLC-chromatogram of purified Cys-Ph-TAHA. The mobile phase contained of 0.1% TFA in water (solvent A) and 0.1% TFA in acetonitrile (solvent B). Gradient: 0–30% B in 15 min.

### $^1\text{H-NMR}$ ( $\text{D}_2\text{O}$ , 400 MHz)

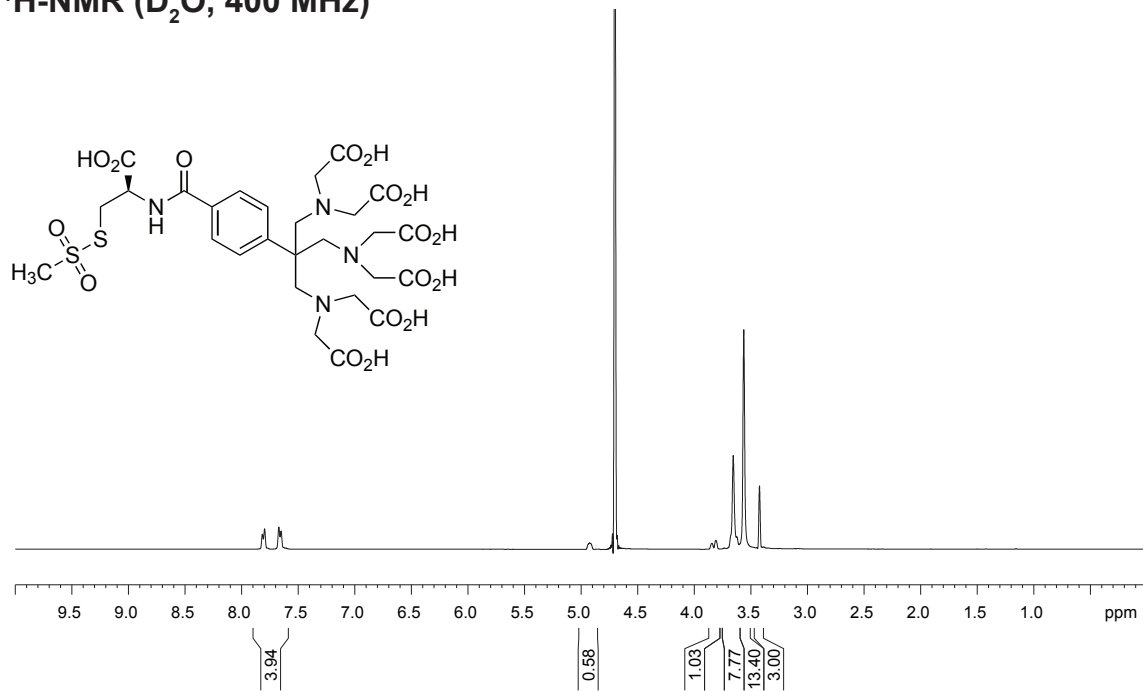

### $^{13}\text{C-NMR}$ ( $\text{D}_2\text{O}$ , 100.6 MHz)

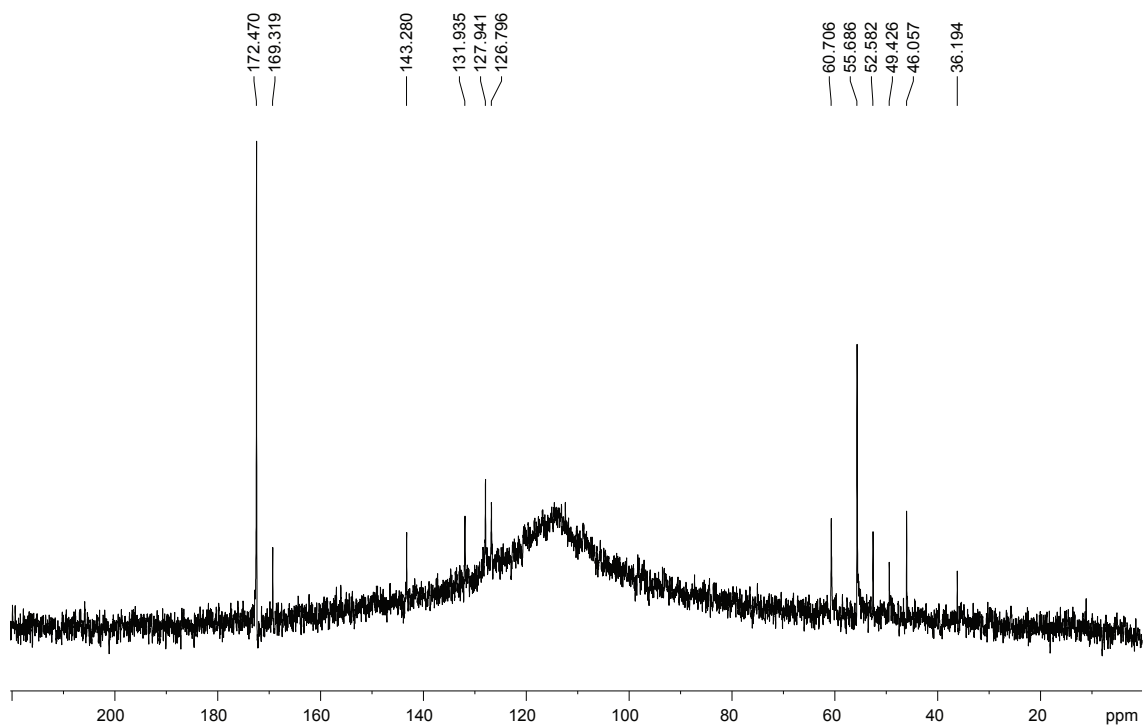

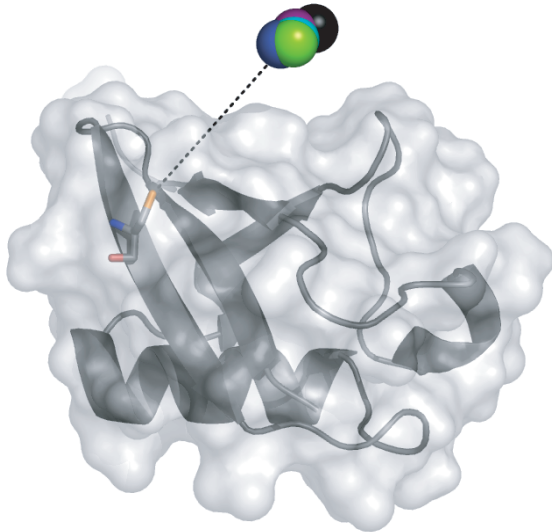

**Figure S1.** 3D-structure (1D3Z) of ubiquitin-T12C with the back-calculated metal positions (12.8 Å at 298 K) for thulium at different temperatures: 278 K = black; 288 K = dark blue; 298 K = purple; 308 K = cyan; 315 K = green. The structure shows that there is no direct interaction of the metal with protein side chains.



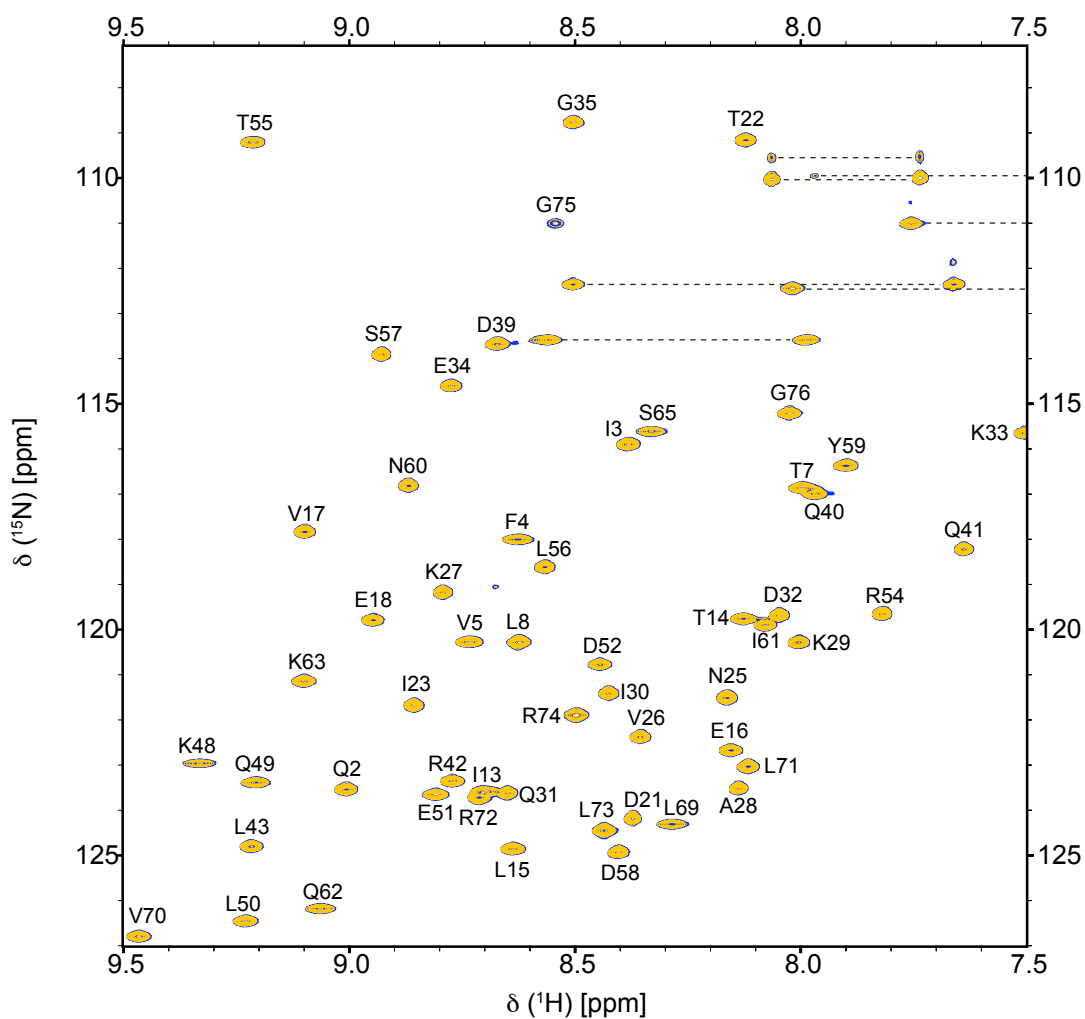

**Figure S2.** T12C Tm: sections of superimposed  $^1\text{H}$ - $^{15}\text{N}$  HSQC spectra, measured at 308 K. The spectra were recorded before (blue) and after (orange) an overnight incubation at 308 K. The dashed lines connect side chain signals.

**Table S1.** Chemical shifts, PCS and RDCs of T12C Tb and T12C Tm. The asterisks indicate values that were excluded from the calculations either due to overlapped/weak peaks or mobility. The bars reflect values that were not detectable due to PRE.

| Residue | T12C Lu                    |                             |                            |                             | T12C               |                     |       | T12C Tm                    |                             |                    |                     |       |
|---------|----------------------------|-----------------------------|----------------------------|-----------------------------|--------------------|---------------------|-------|----------------------------|-----------------------------|--------------------|---------------------|-------|
|         | $\delta$ ( <sup>1</sup> H) | $\delta$ ( <sup>15</sup> N) | $\delta$ ( <sup>1</sup> H) | $\delta$ ( <sup>15</sup> N) | <sup>1</sup> H-PCS | <sup>15</sup> N-PCS | RDC   | $\delta$ ( <sup>1</sup> H) | $\delta$ ( <sup>15</sup> N) | <sup>1</sup> H-PCS | <sup>15</sup> N-PCS | RDC   |
| Q2      | 8.951                      | 123.475                     | 9.187                      | 123.653                     | 0.236              | 0.178               | -6.60 | 8.987                      | 123.488                     | 0.036              | 0.013               | -1.39 |
| I3      | 8.391                      | 115.876                     | 8.616                      | 116.103                     | 0.225              | 0.227               | 5.22  | 8.301                      | 115.792                     | -0.090             | -0.084              | -6.27 |
| F4      | 8.793                      | 118.262                     | 8.799                      | 118.436                     | 0.006              | 0.174               | 14.44 | 8.578                      | 117.883                     | -0.215             | -0.379              | -9.65 |
| V5      | 9.254                      | 120.774                     | 9.655                      | 121.027                     | 0.401              | 0.253               | 17.81 | 8.629                      | 120.212                     | -0.625             | -0.562              | -9.93 |
| K6      | 9.113                      | 129.453                     | -                          | -                           | -                  | -                   | -     | 8.620                      | 128.677                     | -0.493             | -0.776              | -6.93 |
| T7      | 8.887                      | 117.897                     | 10.127                     | 119.039                     | 1.240              | 1.142               | *     | 7.843                      | 116.999                     | -1.044             | -0.898              | -4.82 |
| L8      | 9.065                      | 120.995                     | 9.837                      | 122.067                     | 0.772              | 1.072               | -6.26 | 8.569                      | 120.369                     | -0.496             | -0.626              | 5.50  |
| T9      | 7.657                      | 106.085                     | 8.657                      | 107.144                     | 1.000              | 1.059               | -5.67 | 7.045                      | 105.467                     | -0.612             | -0.618              | 6.32  |
| G10     | 7.989                      | 110.048                     | 9.732                      | 111.644                     | 1.743              | 1.596               | -     | 6.886                      | 109.036                     | -1.103             | -1.012              | 3.47  |
| K11     | 7.210                      | 121.375                     | -                          | -                           | -                  | -                   | -     | 6.388                      | 120.404                     | -0.822             | -0.971              | -1.98 |
| C12     | 8.726                      | 123.497                     | -                          | -                           | -                  | -                   | -     | -                          | -                           | -                  | -                   | -     |
| I13     | 9.575                      | 124.879                     | 10.568                     | 126.161                     | 0.993              | 1.282               | -     | 8.581                      | 123.731                     | -0.994             | -1.148              | -9.27 |
| T14     | 8.696                      | 120.484                     | 9.553                      | 121.323                     | 0.857              | 0.839               | 13.19 | 8.085                      | 119.876                     | -0.611             | -0.608              | -8.43 |
| L15     | 8.845                      | 125.132                     | 9.211                      | 125.494                     | 0.366              | 0.362               | 6.29  | 8.569                      | 124.860                     | -0.276             | -0.272              | -5.66 |
| E16     | 8.148                      | 122.747                     | 8.307                      | 122.902                     | 0.159              | 0.155               | -0.71 | 8.093                      | 122.676                     | -0.055             | -0.071              | -5.36 |
| V17     | 8.979                      | 117.766                     | 8.998                      | 117.728                     | 0.019              | -0.038              | -6.81 | 9.058                      | 117.848                     | 0.079              | 0.082               | 1.22  |
| E18     | 8.701                      | 119.472                     | 8.585                      | 119.315                     | -0.116             | -0.157              | -6.04 | 8.866                      | 119.628                     | 0.165              | 0.156               | -1.21 |
| S20     | 7.072                      | 103.568                     | 6.890                      | 103.393                     | -0.182             | -0.175              | 10.30 | 7.301                      | 103.788                     | 0.229              | 0.220               | -7.39 |
| D21     | 8.111                      | 124.124                     | 7.920                      | 123.907                     | -0.191             | -0.217              | -6.05 | 8.344                      | 124.345                     | 0.233              | 0.221               | 4.62  |
| T22     | 7.917                      | 109.099                     | 7.754                      | 108.949                     | -0.163             | -0.150              | 5.77  | 8.098                      | 109.284                     | 0.181              | 0.185               | -3.07 |
| I23     | 8.559                      | 121.431                     | 8.307                      | 121.212                     | -0.252             | -0.219              | 13.37 | 8.826                      | 121.686                     | 0.267              | 0.255               | -7.06 |
| N25     | 7.965                      | 121.551                     | 7.815                      | 121.453                     | -0.150             | -0.098              | 4.51  | 8.121                      | 121.651                     | 0.156              | 0.100               | -3.79 |
| V26     | 8.148                      | 122.367                     | 7.988                      | 122.258                     | -0.160             | -0.109              | 14.35 | 8.319                      | 122.496                     | 0.171              | 0.129               | -7.37 |
| K27     | 8.602                      | 119.163                     | 8.458                      | 119.047                     | -0.144             | -0.116              | 6.96  | 8.750                      | 119.288                     | 0.148              | 0.125               | -1.07 |
| A28     | 7.980                      | 123.583                     | 7.899                      | 123.546                     | -0.081             | -0.037              | 0.42  | 8.063                      | 123.629                     | 0.083              | 0.046               | 1.15  |
| K29     | 7.883                      | 120.383                     | 7.848                      | 120.412                     | -0.035             | 0.029               | 10.15 | 7.933                      | 120.388                     | 0.050              | 0.005               | -6.82 |
| I30     | 8.363                      | 121.579                     | 8.371                      | 121.629                     | 0.008              | 0.050               | 10.59 | 8.371                      | 121.564                     | 0.008              | -0.015              | -4.01 |
| Q31     | 8.580                      | 123.688                     | 8.594                      | 123.730                     | 0.014              | 0.042               | 1.71  | 8.573                      | 123.592                     | -0.007             | -0.096              | 2.62  |
| D32     | 8.009                      | 119.792                     | 8.039                      | 119.863                     | 0.030              | 0.071               | 1.55  | 7.989                      | 119.734                     | -0.020             | -0.058              | -0.55 |
| K33     | 7.468                      | 115.775                     | 7.561                      | 115.883                     | 0.093              | 0.108               | 12.59 | 7.397                      | 115.688                     | -0.071             | -0.087              | -7.76 |
| E34     | 8.801                      | 114.662                     | 8.939                      | 114.746                     | 0.138              | 0.084               | 4.40  | 8.691                      | 114.559                     | -0.110             | -0.103              | 0.85  |
| G35     | 8.501                      | 108.935                     | 8.580                      | 108.964                     | 0.079              | 0.029               | -9.30 | 8.424                      | 108.861                     | -0.077             | -0.074              | 5.48  |
| I36     | 6.198                      | 120.455                     | 6.268                      | 120.486                     | 0.070              | 0.031               | -7.94 | 6.127                      | 120.384                     | -0.071             | -0.071              | -1.27 |
| D39     | 8.572                      | 113.785                     | 8.503                      | 113.757                     | -0.069             | -0.028              | 6.78  | 8.615                      | 113.800                     | 0.043              | 0.015               | -5.26 |
| Q40     | 7.866                      | 117.011                     | 7.800                      | 116.955                     | -0.066             | -0.056              | 12.94 | 7.901                      | 117.041                     | 0.035              | 0.030               | -7.67 |
| Q41     | 7.524                      | 118.286                     | 7.428                      | 118.146                     | -0.096             | -0.140              | -8.39 | 7.593                      | 118.372                     | 0.069              | 0.086               | 11.03 |
| R42     | 8.539                      | 123.329                     | 8.321                      | 123.065                     | -0.218             | -0.264              | -3.27 | 8.713                      | 123.502                     | 0.174              | 0.173               | 8.08  |
| L43     | 8.816                      | 124.468                     | 8.374                      | 123.977                     | -0.442             | -0.491              | -2.13 | 9.234                      | 124.920                     | 0.418              | 0.452               | 7.27  |
| I44     | 9.169                      | 122.725                     | 8.095                      | 121.711                     | -1.074             | -1.014              | -     | 10.166                     | 123.682                     | 0.997              | 0.957               | -2.70 |
| F45     | 8.859                      | 124.713                     | 7.507                      | 123.263                     | -1.352             | -1.450              | -     | 10.349                     | 126.476                     | 1.490              | 1.763               | -4.93 |
| A46     | 9.142                      | 133.633                     | -                          | -                           | -                  | -                   | -     | -                          | -                           | -                  | -                   | -     |
| G47     | 8.295                      | 106.775                     | -                          | -                           | -                  | -                   | -     | -                          | -                           | -                  | -                   | -     |
| K48     | 8.034                      | 122.131                     | -                          | -                           | -                  | -                   | -     | 9.440                      | 123.246                     | 1.406              | 1.115               | -6.03 |
| Q49     | 8.664                      | 122.923                     | 8.141                      | 122.341                     | -0.523             | -0.582              | 14.78 | 9.257                      | 123.565                     | 0.593              | 0.642               | -8.21 |
| L50     | 8.631                      | 125.972                     | 8.001                      | 125.369                     | -0.630             | -0.603              | 3.65  | 9.266                      | 126.595                     | 0.635              | 0.623               | 1.82  |
| E51     | 8.432                      | 123.360                     | 8.065                      | 122.973                     | -0.367             | -0.387              | *     | 8.826                      | 123.731                     | 0.394              | 0.371               | -3.26 |
| D52     | 8.211                      | 120.650                     | 7.974                      | 120.400                     | -0.237             | -0.250              | -4.78 | 8.44                       | 120.895                     | 0.229              | 0.245               | -0.04 |

|     |       |         |       |         |        |        |        |       |         |        |       |        |
|-----|-------|---------|-------|---------|--------|--------|--------|-------|---------|--------|-------|--------|
| R54 | 7.532 | 119.598 | 7.294 | 119.331 | -0.238 | -0.267 | -8.05  | 7.783 | 119.849 | 0.251  | 0.251 | 6.63   |
| T55 | 8.870 | 108.963 | 8.584 | 108.727 | -0.286 | -0.236 | 8.87   | 9.179 | 109.229 | 0.309  | 0.266 | -6.37  |
| L56 | 8.183 | 118.229 | 7.866 | 117.873 | -0.317 | -0.356 | 10.88  | 8.537 | 118.629 | 0.354  | 0.400 | -5.90  |
| S57 | 8.535 | 113.605 | 8.172 | 113.197 | -0.363 | -0.408 | 3.01   | 8.943 | 114.059 | 0.408  | 0.454 | -0.27  |
| D58 | 7.977 | 124.679 | 7.595 | 124.312 | -0.382 | -0.367 | 3.79   | 8.397 | 125.090 | 0.420  | 0.411 | -4.87  |
| Y59 | 7.312 | 115.960 | 6.765 | 115.420 | -0.547 | -0.540 | 15.29  | 7.904 | 116.552 | 0.592  | 0.592 | -9.24  |
| N60 | 8.189 | 116.145 | 7.514 | 115.306 | -0.675 | -0.839 | -9.61  | 8.896 | 117.020 | 0.707  | 0.875 | 10.91  |
| I61 | 7.254 | 119.080 | 6.444 | 118.083 | -0.810 | -0.997 | -8.72  | 8.146 | 120.157 | 0.892  | 1.077 | 8.61   |
| Q62 | 7.770 | 125.201 | 6.545 | 124.197 | -1.225 | -1.004 | -4.41  | 9.243 | 126.416 | 1.473  | 1.215 | 5.90   |
| K63 | 8.500 | 120.591 | 8.080 | 120.178 | -0.420 | -0.413 | -10.47 | 9.168 | 121.296 | 0.668  | 0.705 | 4.77   |
| E64 | 9.465 | 114.976 | 9.686 | 115.181 | 0.221  | 0.205  | 1.80   | 9.656 | 115.252 | 0.191  | 0.276 | -1.03  |
| S65 | 7.729 | 115.217 | -     | -       | -      | -      | -      | 8.397 | 115.897 | 0.668  | 0.680 | -      |
| T66 | 8.872 | 117.747 | -     | -       | -      | -      | -      | -     | -       | -      | -     | -      |
| L67 | 9.340 | 127.737 | -     | -       | -      | -      | -      | 9.476 | 128.116 | 0.136  | 0.379 | -13.29 |
| H68 | 9.329 | 120.108 | -     | -       | -      | -      | -      | -     | -       | -      | -     | -      |
| L69 | 8.213 | 123.981 | -     | -       | -      | -      | -      | 8.242 | 124.313 | 0.029  | 0.332 | 3.50   |
| V70 | 9.184 | 126.626 | 8.881 | 126.443 | -0.303 | -0.183 | -8.14  | 9.466 | 126.920 | 0.282  | 0.294 | 9.18   |
| L71 | 8.117 | 122.964 | 8.041 | 122.853 | -0.076 | -0.111 | *      | 8.093 | 123.030 | -0.024 | 0.066 | 8.58   |
| R72 | 8.610 | 123.734 | 8.487 | 123.616 | -0.123 | -0.118 | 3.20   | 8.646 | 123.772 | 0.036  | 0.038 | -0.64  |
| L73 | 8.401 | 124.667 | 8.248 | 124.525 | -0.153 | -0.142 | 4.14   | 8.422 | 124.689 | 0.021  | 0.022 | -1.61  |
| R74 | 8.480 | 122.133 | 8.369 | 122.011 | *      | *      | *      | 8.469 | 122.127 | *      | *     | *      |
| G75 | 8.518 | 111.191 | 8.426 | 111.072 | *      | *      | *      | 8.512 | 111.191 | *      | *     | *      |
| G76 | 7.989 | 115.258 | 7.883 | 115.149 | *      | *      | *      | 7.985 | 115.248 | *      | *     | *      |

**Table S2.** Chemical shifts, PCS and RDCs of S57C Tb and S57C Tm. The asterisks indicate values that were excluded from the calculations either due to overlapped/weak peaks or mobility. The bars reflect values that were not detectable due to PRE.

| Residue | S57C Lu                    |                             |                            | S57C Tb                     |                    |                     | S57C Tm |                            |                             |                    |                     |       |
|---------|----------------------------|-----------------------------|----------------------------|-----------------------------|--------------------|---------------------|---------|----------------------------|-----------------------------|--------------------|---------------------|-------|
|         | $\delta$ ( <sup>1</sup> H) | $\delta$ ( <sup>15</sup> N) | $\delta$ ( <sup>1</sup> H) | $\delta$ ( <sup>15</sup> N) | <sup>1</sup> H-PCS | <sup>15</sup> N-PCS | RDC     | $\delta$ ( <sup>1</sup> H) | $\delta$ ( <sup>15</sup> N) | <sup>1</sup> H-PCS | <sup>15</sup> N-PCS | RDC   |
| Q2      | 8.872                      | 123.052                     | -                          | -                           | -                  | -                   | -       | -                          | -                           | -                  | -                   | -     |
| I3      | 8.206                      | 115.198                     | -                          | -                           | -                  | -                   | -       | -                          | -                           | -                  | -                   | -     |
| F4      | 8.542                      | 118.579                     | 9.268                      | 119.195                     | 0.726              | 0.616               | -1.82   | 8.133                      | 118.137                     | -0.409             | -0.442              | -     |
| V5      | 9.189                      | 121.155                     | 9.540                      | 121.565                     | 0.351              | 0.410               | -1.74   | 8.921                      | 120.856                     | -0.268             | -0.299              | *     |
| K6      | 8.902                      | 128.063                     | 9.232                      | 128.356                     | 0.330              | 0.293               | -5.18   | 8.710                      | 127.868                     | -0.192             | -0.195              | -1.39 |
| T7      | 8.653                      | 115.460                     | 8.807                      | 115.656                     | 0.154              | 0.196               | -3.23   | 8.531                      | 115.345                     | -0.122             | -0.115              | 4.31  |
| L8      | 9.035                      | 121.227                     | 9.165                      | 121.353                     | 0.130              | 0.126               | -1.02   | 8.944                      | 121.135                     | -0.091             | -0.092              | 4.78  |
| T9      | 7.552                      | 105.878                     | 7.641                      | 105.982                     | 0.089              | 0.104               | 2.90    | 7.482                      | 105.813                     | -0.070             | -0.065              | -1.23 |
| G10     | 7.747                      | 109.246                     | 7.832                      | 109.319                     | 0.085              | 0.073               | -7.35   | 7.674                      | 109.194                     | -0.073             | -0.052              | 1.56  |
| K11     | 7.179                      | 121.891                     | 7.250                      | 121.975                     | 0.071              | 0.084               | 0.230   | 7.094                      | 121.813                     | -0.085             | -0.078              | 5.67  |
| T12     | 8.553                      | 120.649                     | 8.613                      | 120.743                     | 0.060              | 0.094               | -4.97   | 8.460                      | 120.554                     | -0.093             | -0.095              | 3.11  |
| I13     | 9.483                      | 127.65                      | 9.657                      | 127.747                     | 0.174              | 0.097               | -1.32   | 9.304                      | 127.454                     | -0.179             | -0.196              | -0.45 |
| T14     | 8.649                      | 121.672                     | 8.655                      | 121.703                     | 0.006              | 0.031               | -3.12   | 8.443                      | 121.409                     | -0.206             | -0.263              | -5.05 |
| L15     | 8.696                      | 125.51                      | 9.133                      | 125.956                     | 0.437              | 0.446               | -0.23   | -                          | -                           | -                  | -                   | -     |
| E16     | 8.017                      | 122.542                     | -                          | -                           | -                  | -                   | -       | -                          | -                           | -                  | -                   | -     |
| V17     | 8.848                      | 117.494                     | -                          | -                           | -                  | -                   | -       | -                          | -                           | -                  | -                   | -     |
| E18     | 8.616                      | 120.298                     | -                          | -                           | -                  | -                   | -       | -                          | -                           | -                  | -                   | -     |
| S20     | 7.006                      | 103.385                     | -                          | -                           | -                  | -                   | -       | -                          | -                           | -                  | -                   | -     |
| D21     | 7.903                      | 123.324                     | -                          | -                           | -                  | -                   | -       | -                          | -                           | -                  | -                   | -     |
| T22     | 7.661                      | 108.069                     | -                          | -                           | -                  | -                   | -       | -                          | -                           | -                  | -                   | -     |
| I23     | 8.443                      | 121.284                     | 9.198                      | 122.096                     | 0.755              | 0.812               | -5.91   | -                          | -                           | -                  | -                   | -     |
| N25     | 7.843                      | 121.392                     | -                          | -                           | -                  | -                   | -       | -                          | -                           | -                  | -                   | -     |
| V26     | 7.996                      | 122.212                     | -                          | -                           | -                  | -                   | -       | 8.006                      | 122.153                     | 0.010              | -0.059              | *     |
| K27     | 8.448                      | 118.807                     | 9.053                      | 119.302                     | 0.605              | 0.495               | -6.02   | 8.378                      | 118.643                     | -0.070             | -0.164              | 0.15  |
| A28     | 7.899                      | 123.482                     | 8.332                      | 123.862                     | 0.433              | 0.380               | -5.77   | 7.884                      | 123.409                     | -0.015             | -0.073              | -2.60 |
| K29     | 7.777                      | 120.248                     | 8.266                      | 120.618                     | 0.489              | 0.370               | -4.63   | 7.579                      | 120.026                     | -0.198             | -0.222              | -5.12 |
| I30     | 8.201                      | 121.474                     | 8.609                      | 121.835                     | 0.408              | 0.361               | -6.17   | 7.956                      | 121.234                     | -0.245             | -0.240              | -0.75 |
| Q31     | 8.455                      | 123.495                     | 8.688                      | 123.673                     | 0.233              | 0.178               | -7.24   | 8.301                      | 123.307                     | -0.154             | -0.188              | -1.80 |
| D32     | 7.922                      | 119.736                     | 8.052                      | 119.817                     | 0.130              | 0.506               | -5.49   | 8.574                      | 124.729                     | -0.174             | -0.166              | -3.61 |
| K33     | 7.350                      | 115.493                     | 7.441                      | 115.531                     | 0.091              | 0.421               | -4.29   | 8.693                      | 132.653                     | -0.208             | -0.217              | -2.86 |
| E34     | 8.641                      | 114.355                     | 8.731                      | 114.422                     | 0.090              | 0.401               | -6.36   | 8.623                      | 124.432                     | -0.092             | -0.064              | -0.09 |
| G35     | 8.404                      | 108.875                     | 8.459                      | 108.959                     | 0.055              | 0.398               | 4.30    | 8.882                      | 122.162                     | -0.165             | -0.182              | -2.11 |
| I36     | 6.068                      | 120.303                     | 6.169                      | 120.399                     | 0.101              | 0.316               | 1.76    | 8.331                      | 123.167                     | -0.078             | -0.050              | 4.10  |
| D39     | 8.442                      | 113.616                     | 8.565                      | 113.773                     | 0.123              | 0.268               | 1.03    | 7.866                      | 102.306                     | -0.133             | -0.130              | -2.66 |
| Q40     | 7.739                      | 116.861                     | 7.883                      | 117.058                     | 0.144              | 0.238               | 4.41    | 7.353                      | 118.084                     | -0.043             | -0.040              | -2.09 |
| Q41     | 7.396                      | 118.124                     | 7.580                      | 118.362                     | 0.184              | 0.197               | -0.26   | 7.713                      | 116.824                     | -0.026             | -0.037              | 1.25  |
| R42     | 8.409                      | 123.217                     | 8.646                      | 123.533                     | 0.237              | 0.157               | -6.32   | 8.440                      | 113.575                     | -0.002             | -0.041              | *     |
| L43     | 8.715                      | 124.496                     | 9.072                      | 124.897                     | 0.357              | 0.096               | *       | 5.964                      | 120.222                     | -0.104             | -0.081              | *     |
| I44     | 9.047                      | 122.344                     | 9.449                      | 122.742                     | 0.402              | 0.084               | -6.36   | 8.272                      | 108.751                     | -0.132             | -0.124              | 1.36  |
| F45     | 8.748                      | 124.895                     | 9.194                      | 125.401                     | 0.446              | 0.081               | *       | 7.734                      | 119.532                     | -0.188             | -0.204              | *     |
| A46     | 8.901                      | 132.870                     | 9.317                      | 133.291                     | 0.416              | 0.067               | -5.36   | 8.470                      | 114.193                     | -0.171             | -0.162              | 1.81  |
| G47     | 7.999                      | 102.436                     | 8.274                      | 102.704                     | 0.275              | 0.038               | -5.02   | 7.119                      | 115.262                     | -0.231             | -0.231              | -4.40 |
| K48     | 7.909                      | 122.058                     | 8.203                      | 122.325                     | 0.294              | 0.267               | 3.41    | 7.789                      | 121.991                     | -0.120             | -0.067              | 3.47  |
| Q49     | 8.546                      | 123.058                     | 8.784                      | 123.349                     | 0.238              | 0.291               | 1.63    | 8.526                      | 122.985                     | -0.020             | -0.073              | -0.78 |
| L50     | 8.458                      | 125.632                     | 8.853                      | 125.966                     | 0.395              | 0.334               | -7.29   | 8.366                      | 125.53                      | -0.092             | -0.102              | -0.12 |
| E51     | 8.342                      | 123.136                     | 8.706                      | 123.519                     | 0.364              | 0.383               | *       | -                          | -                           | -                  | -                   | -     |

|     |       |         |        |         |       |       |       |       |         |        |        |       |
|-----|-------|---------|--------|---------|-------|-------|-------|-------|---------|--------|--------|-------|
| D52 | 8.074 | 120.255 | 8.330  | 120.620 | 0.256 | 0.365 | 4.43  | 8.162 | 120.374 | 0.088  | 0.119  | 0.21  |
| R54 | 7.346 | 119.270 | 7.694  | 119.556 | 0.348 | 0.286 | 0.04  | -     | -       | -      | -      | -     |
| T55 | 8.885 | 109.171 | -      | -       | -     | -     | -     | -     | -       | -      | -      | -     |
| L56 | 8.093 | 117.596 | 10.126 | 119.349 | 2.033 | 1.753 | -     | -     | -       | -      | -      | -     |
| C57 | 7.935 | 116.710 | -      | -       | -     | -     | -     | -     | -       | -      | -      | -     |
| D58 | 7.838 | 122.117 | -      | -       | -     | -     | -     | -     | -       | -      | -      | -     |
| Y59 | 7.089 | 115.262 | 8.248  | 116.265 | 1.159 | 1.003 | 3.43  | 6.269 | 114.455 | -0.820 | -0.807 | *     |
| N60 | 8.113 | 116.590 | 9.415  | 117.952 | 1.302 | 1.362 | -1.69 | 6.854 | 115.398 | -1.259 | -1.192 | 3.29  |
| I61 | 7.308 | 118.889 | 9.021  | 120.505 | 1.713 | 1.616 | -2.05 | -     | -       | -      | -      | -     |
| Q62 | 7.406 | 124.638 | 8.922  | 126.552 | 1.516 | 1.914 | 3.90  | -     | -       | -      | -      | -     |
| K63 | 8.503 | 120.763 | -      | -       | -     | -     | -     | -     | -       | -      | -      | -     |
| E64 | 9.203 | 114.330 | -      | -       | -     | -     | -     | -     | -       | -      | -      | -     |
| S65 | 7.560 | 114.865 | -      | -       | -     | -     | -     | -     | -       | -      | -      | -     |
| T66 | 8.621 | 117.415 | 9.179  | 118.011 | 0.558 | 0.596 | 0.19  | 8.341 | 117.071 | -0.280 | -0.344 | -5.41 |
| L67 | 9.309 | 127.736 | 9.897  | 128.337 | 0.588 | 0.601 | 0.69  | 8.990 | 127.401 | -0.319 | -0.335 | -2.44 |
| H68 | 9.122 | 119.647 | 9.555  | 120.036 | 0.433 | 0.389 | -6.58 | 8.914 | 119.395 | -0.208 | -0.252 | 0.14  |
| L69 | 8.190 | 123.755 | 8.468  | 124.061 | 0.278 | 0.306 | -5.83 | 8.043 | 123.634 | -0.147 | -0.121 | 3.81  |
| V70 | 9.085 | 126.492 | 9.331  | 126.674 | 0.246 | 0.182 | -4.57 | 8.980 | 126.362 | -0.105 | -0.130 | 0.33  |
| L71 | 8.026 | 123.064 | 8.180  | 123.234 | 0.154 | 0.170 | -0.68 | 7.950 | 122.999 | -0.076 | -0.065 | 2.02  |
| R72 | 8.503 | 123.679 | 8.643  | 123.873 | 0.140 | 0.194 | 4.88  | 8.447 | 123.607 | -0.056 | -0.072 | -2.45 |
| L73 | 8.265 | 124.509 | 8.379  | 124.649 | 0.114 | 0.140 | *     | 8.229 | 124.454 | -0.036 | -0.055 | -2.59 |
| R74 | 8.349 | 121.956 | 8.443  | 122.073 | *     | *     | *     | 8.307 | 121.915 | *      | *      | *     |
| G75 | 8.392 | 111.040 | 8.478  | 111.140 | *     | *     | *     | 8.367 | 111.011 | *      | *      | *     |
| G76 | 7.858 | 115.077 | 7.926  | 115.160 | *     | *     | *     | 7.844 | 115.056 | *      | *      | *     |
